# Supplementary material for: Mice with Whole-Body Disruption of AMPK-Glycogen Binding Have Increased Adiposity, Reduced Fat Oxidation and Altered Tissue Glycogen Dynamics
Source: MDPI journal article supplement (doi:10.3390/ijms22179616), 2021-09-05
Supplement: s1 [file s1]

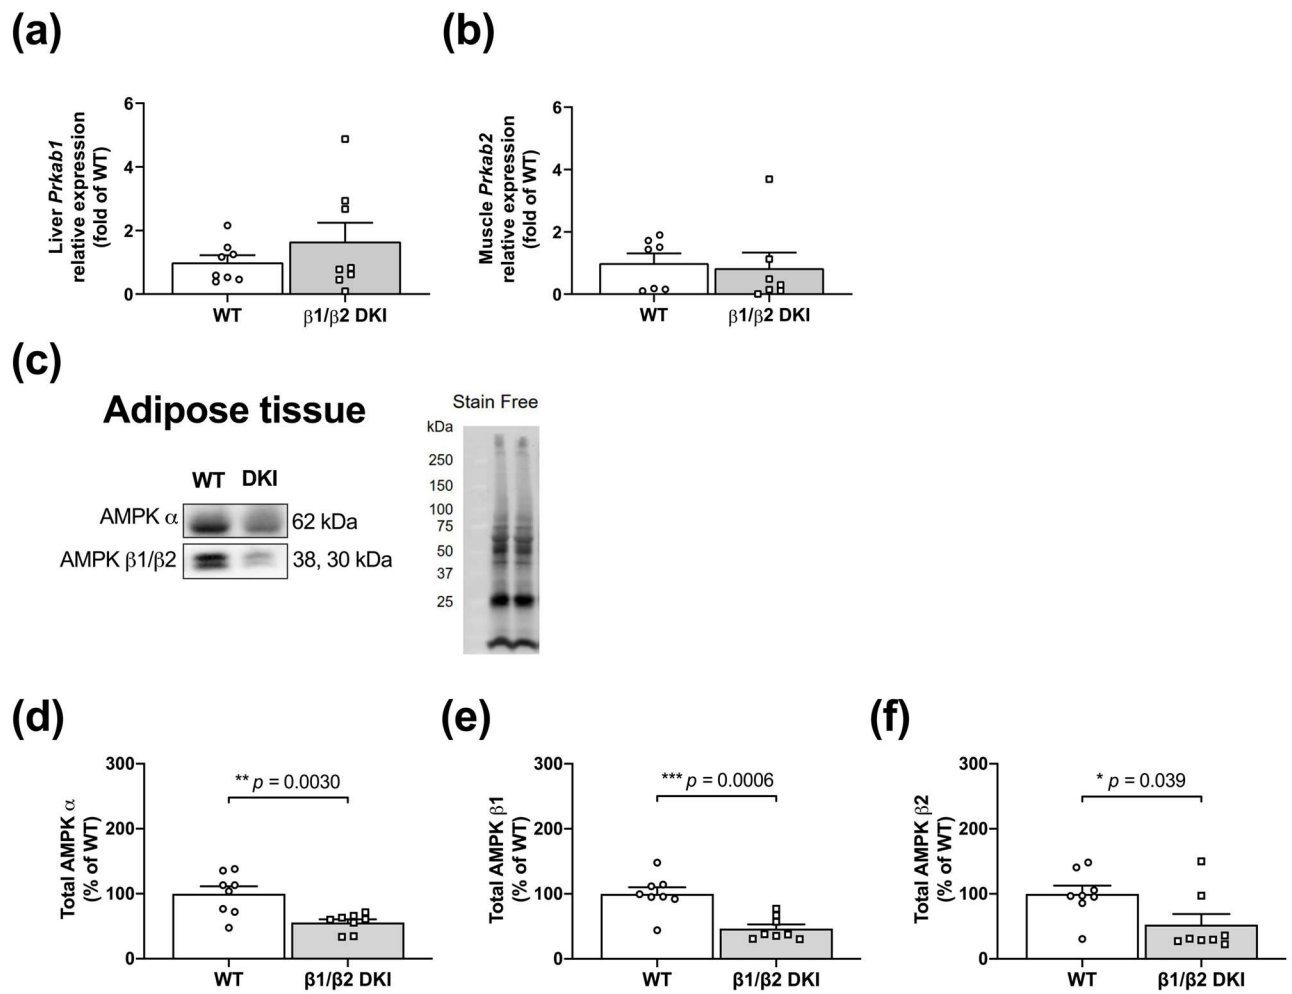

**Figure S1.** DK1 mice display no differences in liver *Prkab1* or muscle *Prkab2* gene expression versus WT, and DK1 adipose tissue displays reduced AMPK content. Gene expression was assessed in DK1 and WT liver and skeletal muscle using qPCR. (a) Relative *Prkab1* (AMPK  $\beta 1$ ) gene expression in WT and DK1 liver and (b) relative *Prkab2* (AMPK  $\beta 2$ ) gene expression in WT and DK1 skeletal muscle. Overnight fasted (~14 h), male mice,  $n = 7-8$ , 20-32 wk. AMPK subunit protein content was assessed in epididymal adipose tissue. (c) Representative immunoblots and stain free images collected from fed DK1 and WT mice. Quantified (d) AMPK  $\alpha$ , (e) AMPK  $\beta 1$ , and (f) AMPK  $\beta 2$ . Male mice,  $n = 8$ , 17-20 wk. \*  $p < 0.05$ , \*\*  $p < 0.01$ , \*\*\*  $p < 0.001$ , \*\*\*\*  $p < 0.0001$ .
